# Supplementary material
Source: Springer Nature journal article supplement (https://www.springermedizin.de/resource/supplementary/11689_2014_91_MOESM1_ESM.pdf/9673224)
Supplement: MOESM1 [file 9673224]

**Title**

**EEG hyper-connectivity in high-risk infants is associated with later autism**

**Authors**

Orekhova E.V, Elsabbagh, M, Jones, E., Dawson, G., Charman, T., Johnson, M.H. and the BASIS team.

**ADDITIONAL INFORMATION:**

**Summary of the previous EEG and MEG studies of brain functional connectivity in ASD.**

*Abbreviation: ; ACC – anterior cingulate cortex; AVE – average reference; CMS-DRL - Common Mode Sense-Driven Right Leg reference; IFG – inferior frontal gyrus; MI - mutual information; nviIQ – non-verbal IQ; PDC - Partial directed coherence; PLI - phase lag index; REF – reference; RIM - robust interdependence measure; SL - Synchronization Likelihood.*

| <b>Authors/<br/>Year</b>      | <b>Age,<br/>Number of<br/>participants<br/>IQ</b>                 | <b>Method of<br/>connectivity<br/>analysis,<br/>EEG reference</b> | <b>Condition</b>                                                                                                         | <b>Spectral<br/>power results</b> | <b>Connectivity results</b>                                                                                                                                                                                                                                                       |
|-------------------------------|-------------------------------------------------------------------|-------------------------------------------------------------------|--------------------------------------------------------------------------------------------------------------------------|-----------------------------------|-----------------------------------------------------------------------------------------------------------------------------------------------------------------------------------------------------------------------------------------------------------------------------------|
| Boersma et al.<br>2013<br>(1) | <b>3.5 yrs</b><br>12 ASD,<br>IQ =108(12);<br>19 TD,<br>IQ =85(17) | EEG: <b>PLI</b> ;<br>REF: CMS-DRL                                 | Passively<br>watched<br>pictures of cars<br>and faces; trials<br>of 1 s length<br>(including 100<br>ms pre-<br>stimulus) | Not analyzed                      | <b>No differences</b> in connectivity<br>strength in 4–10 Hz band;<br><b>decreased connectivity</b> in ASD in<br>10-25 Hz band.<br><i>Graph analysis:</i> decreased ‘small-<br>worldness’ in ASD at 4–10 Hz;<br>Decreased clustering and<br>increased path length at 10-25<br>Hz. |

|                                |                                                                                           |                                                                                         |                                                                                             |                                                                                                                                                                              |                                                                                                                                                                                                                     |
|--------------------------------|-------------------------------------------------------------------------------------------|-----------------------------------------------------------------------------------------|---------------------------------------------------------------------------------------------|------------------------------------------------------------------------------------------------------------------------------------------------------------------------------|---------------------------------------------------------------------------------------------------------------------------------------------------------------------------------------------------------------------|
| Kikuchi et al.<br>2014<br>(2)  | <b>3.2-7.7 yrs</b><br>50 ASD<br>50 TD                                                     | MEG: <b>Coherence</b><br>between sensors<br>located ~20 cm<br>apart from one<br>another | Watched a<br>video program<br>(with sound)                                                  | No differences                                                                                                                                                               | <b>Decreased</b> theta coherence (with<br>maximal effect at 6 Hz) between<br>left frontal and right posterior<br>sensors.                                                                                           |
| Isler et al,<br>2010<br>(3)    | <b>5.5-8.5 yrs</b><br>6 ASD,<br>IQ=67(27)<br>8 TD,<br>IQ=117(10)                          | EEG: <b>Coherence,</b><br><b>Phase synchrony,</b><br>REF: AVE                           | Stroboscopic<br>flashes; ISI 1<br>sec; trials of 1 s<br>length<br>(100 ms pre-<br>stimulus) | Power was<br>increased in<br>ASD                                                                                                                                             | <b>Decreased</b> inter-hemispheric<br>occipital connectivity in ASD in<br>wide frequency range (2-40 Hz)                                                                                                            |
| Coben et al.,<br>2008<br>(4)   | <b>6-11 yrs</b><br>20 ASD,<br>IQ=107(27.4);<br>20TD,<br>IQ=110 (14.7)                     | EEG: <b>Coherence;</b><br>REF: Linked ears                                              | Resting with<br>eyes closed                                                                 | ASD: Decreased<br>absolute delta<br>(1.5-3.5 Hz),<br>and beta<br>(12.5-25 Hz);<br>enhanced<br>relative theta<br>(3.5-7.5 Hz); no<br>differences in<br>alpha (7.5-12.5<br>Hz) | <b>Decreased</b> coherencies in delta,<br>theta, alpha and beta bands.                                                                                                                                              |
| Peters, et al.,<br>2013<br>(5) | <b>0.08-25.6 yrs</b><br>Tuberous<br>Sclerosis<br>patients with<br>(14) and<br>without ASD | EEG: <b>Coherence,</b><br>REF: AVE                                                      | ?                                                                                           | Not analyzed                                                                                                                                                                 | <b>No coherence differences</b> in 4 -<br>8Hz, 8-10Hz and 10-12Hz bands;<br>decreased long over short range<br>coherence ratio in ASD.<br><i>Graph analysis:</i> No differences in<br>network topography; increased |

|                               |                                                                                            |                                                                                             |                                                                                       |                                                                                   |                                                                                                                                                                             |
|-------------------------------|--------------------------------------------------------------------------------------------|---------------------------------------------------------------------------------------------|---------------------------------------------------------------------------------------|-----------------------------------------------------------------------------------|-----------------------------------------------------------------------------------------------------------------------------------------------------------------------------|
|                               | (29), non-syndromic ASD (16), and controls (46). IQ?                                       |                                                                                             |                                                                                       |                                                                                   | resilience in ASD                                                                                                                                                           |
| Duffy et al., 2012<br>(6)     | <b>2-12 years</b><br>430 ASD<br>554 TD<br>IQ?                                              | EEG: <b>Coherence</b> ,<br>REF: Laplacian                                                   | ?                                                                                     | Not analyzed                                                                      | 1-32 Hz range in 2-Hz bands: <b>decreased short-distance</b> and <b>decreased, as well as increased, long-distance</b> coherences in ASD in various bands.                  |
| Lazarev et al., 2009<br>(7)   | <b>6-16 yrs</b><br>14ASD<br>IQ=91(22),<br>19TD<br>IQ?                                      | EEG: <b>Coherence</b> ;<br>REF: unilateral<br>references to the<br>corresponding<br>earlobe | Photic<br>stimulation at<br>12 frequencies<br>between 3-27<br>Hz and resting<br>state | Decreased<br>power in the<br>right<br>hemisphere at<br>all driving<br>frequencies | <b>Coherence increased</b> in the left hemisphere in ASD at the EEG frequencies corresponding to stimulation frequencies (6-27 Hz). No connectivity differences under rest. |
| Velazquez et al., 2009<br>(8) | <b>7-16 yrs</b> ,<br>15 ASD,<br>IQ=111.2(15);<br>16 TD,<br>IQ=123(8)                       | MEG: <b>Phase synchrony</b> at 10, 18, 26 and 32 Hz                                         | Stroop colour word task                                                               | Not analyzed                                                                      | <i>Lack of task-related increase of coherence in ASD;</i>                                                                                                                   |
| Han et al., 2013<br>(9)       | <b>8-17 yrs</b><br>17 HF-ASD<br>IQ= 106 (20);<br>17 LF-ASD<br>IQ= 56 (12)<br>No TD control | EEG: <b>Coherence</b><br>REF: Linked ears                                                   | Resting with eyes open                                                                | Not analyzed                                                                      | <b>Increased coherence</b> in 4-8 Hz band <b>in low-functioning ASD compared to high-functioning ASD</b> . Other bands were not analyzed                                    |

|                                 |                                                                       |                                                                |                                                                         |                                                                                                                                                                                                             |                                                                                                                                                                                                                                                                                                 |
|---------------------------------|-----------------------------------------------------------------------|----------------------------------------------------------------|-------------------------------------------------------------------------|-------------------------------------------------------------------------------------------------------------------------------------------------------------------------------------------------------------|-------------------------------------------------------------------------------------------------------------------------------------------------------------------------------------------------------------------------------------------------------------------------------------------------|
| Lazar et al.,<br>2010<br>(10)   | <b>7.5–21.5 yrs</b><br>18 ASD<br>14 TD,<br>matched on<br>nvIQ (Raven) | EEG: <b>Coherence</b> ,<br>REF: Linked<br>mastoids             | Non-REM sleep                                                           | Increased<br>power in delta<br>(0.5–4 Hz) and<br>decreased in<br>alpha (8–10.75<br>Hz), sigma (11–<br>15 Hz), beta<br>(15.25–25 Hz),<br>gamma 1<br>(25.25–35 Hz)<br>and gamma 2<br>(35.25–45 Hz )<br>bands. | <b>Decreased coherences</b> in delta,<br>theta, alpha and sigma bands.                                                                                                                                                                                                                          |
| Khan et al.,<br>2013<br>(11)    | <b>13-21 yrs</b><br>17 ASD,<br>nvIQ=112(18)<br>20 TD<br>nvIQ=112(16)  | MEG:<br><b>Event-related<br/>coherence in<br/>source space</b> | Pictures of<br>houses and<br>faces presented<br>for 1 s with 1 s<br>ISI | No power<br>differences                                                                                                                                                                                     | <b>Decreased long-range<br/>coherence</b> between fusiform face<br>area and precuneus, IFG, and ACC<br>in ASD, confined to the alpha<br>band.<br>Decrease alpha-gamma phase-<br>amplitude coupling, pointing to<br><b>decreased local coherence</b> .<br>Correlations with ADOS social<br>score |
| Tsiaras et al.,<br>2012<br>(12) | <b>17–21 yrs</b><br>8 ASD,<br>IQ=107(14)                              | MEG: <b>RIM, PDC,<br/>MI</b>                                   | Supine, rest<br>with eyes<br>closed                                     | Not analyzed                                                                                                                                                                                                | <b>Decreased short-range<br/>connections</b> in ASD within<br>bilateral temporal, frontal and left                                                                                                                                                                                              |

|                                |                                                       |                              |                   |              |                                                                                                                                                                                                                                                                                                                                                                                                               |
|--------------------------------|-------------------------------------------------------|------------------------------|-------------------|--------------|---------------------------------------------------------------------------------------------------------------------------------------------------------------------------------------------------------------------------------------------------------------------------------------------------------------------------------------------------------------------------------------------------------------|
|                                | 8 TD<br>IQ=123(6);                                    |                              |                   |              | parietal sector. <b>Decreased long-range connectivity</b> of temporal and frontal regions with all other regions. Group differences were greatest for RIM and restricted to the alpha band.                                                                                                                                                                                                                   |
| Barttfeld et al., 2011<br>(13) | <b>Adults</b><br>10 ASD<br>IQ=107(15)<br>10 TD<br>IQ? | EEG: <b>SL</b><br>REF: AVE   | Rest, eyes-closed | Not analyzed | <b>Decreased long-range connectivity</b> in ASD, most prominent for fronto-occipital connections. <b>Increased short-range connectivity</b> in lateral-frontal electrodes. Only delta range (0.5-3Hz ) was analyzed. <i>Graph analysis</i> : decreased 'small-worldness' in ASD.                                                                                                                              |
| Barttfeld et al., 2013<br>(14) | <b>Adults</b><br>74 neuro-typical subjects            | EEG: <b>SL</b> ;<br>REF: AVE | Rest, eyes-closed | Not analyzed | <b>Decreased connectivity</b> was associated with an increasing number of autistic traits. The effect was greatest for in delta (0.5-4 Hz) and theta (4 Hz to 8 Hz) bands, was present for beta (15-25 Hz) and gamma (25-35 Hz) and was absent for alpha (8-12 Hz) and sigma (12 -15 Hz), bands .<br><i>Graph analysis</i> : 'small-worldness' in the delta band was negatively related to amount of autistic |

|                                |                                                                |                                                         |                                                                                          |                |                                                                                                                                                                                                                                                                                                                                                   |
|--------------------------------|----------------------------------------------------------------|---------------------------------------------------------|------------------------------------------------------------------------------------------|----------------|---------------------------------------------------------------------------------------------------------------------------------------------------------------------------------------------------------------------------------------------------------------------------------------------------------------------------------------------------|
|                                |                                                                |                                                         |                                                                                          |                | traits.                                                                                                                                                                                                                                                                                                                                           |
| Catarino et al., 2013<br>(15)  | <b>Adults</b><br>15 ASD,<br>IQ=119(14)<br>15 TD,<br>IQ=119(13) | EEG: <b>Wavelet coherence</b> ,<br>REF: tip of the nose | Presentation of faces and chairs; matching tasks; 0-400 ms interval after stimulus onset | No differences | <b>Decreased inter-hemispheric coherence</b> in ASD for all electrode pairs studied. Group differences were observed after 150 ms and at frequencies lower than 13 Hz                                                                                                                                                                             |
| Kenet et al., 2012<br>(16)     | <b>Adults</b><br>11 ASD<br>IQ=116(8)<br>11TD<br>IQ=113(9)      | MEG: <b>Coherence</b> ,<br><i>in source space</i>       | Baseline, as well as periods of preparation for pro- or anti-saccades                    | No difference  | <b>Decreased</b> alpha band <b>coherence</b> in ocular motor control network in ASD. Absence of task-related increase in coherence in ASD.                                                                                                                                                                                                        |
| Leveille et al., 2010<br>(17)  | <b>Adults</b><br>9 ASD,<br>IQ= 101.3,<br>11 TD,<br>IQ=115.7    | EEG: <b>Coherence</b><br>REF: Linked ears               | REM sleep                                                                                | Not analyzed   | <b>Increased</b> left intra-hemispheric <b>coherence</b> with 'O1' in ASD; <b>decreased coherence</b> between F6-F4. The differences were significant in delta (0.75–3.75 Hz), and theta (4.00–7.75 Hz), but not in alpha (8.00–12.75 Hz), sigma (12.00–14.00 Hz), or beta (13.00–20.25 Hz) bands. No differences for inter-hemispheric coherence |
| Mathewson et al., 2012<br>(18) | <b>Adults</b><br>15 ASD,<br>IQ=107(12);<br>16 TD,              | EEG,<br><b>Coherence</b> ,<br>REF: Cz                   | eyes-closed and eyes-open                                                                | No differences | Only alpha band (8–13 Hz) analyzed. <b>No group differences in coherence.</b>                                                                                                                                                                                                                                                                     |

|                                |                                                       |                                        |                       |                                                                                                  |                                                                                   |
|--------------------------------|-------------------------------------------------------|----------------------------------------|-----------------------|--------------------------------------------------------------------------------------------------|-----------------------------------------------------------------------------------|
|                                | 101 (19)                                              |                                        |                       |                                                                                                  |                                                                                   |
| Murias et al.,<br>2007<br>(19) | <b>Adults</b> ,<br>18 ASD,<br>IQ>80;<br>18 TD,<br>IQ? | EEG,<br><b>Coherence</b> ,<br>REF: AVE | Rest, eyes-<br>closed | Theta (3-6 Hz)<br>power was<br>increased;<br>alpha (8-10 Hz)<br>power was<br>decreased in<br>ASD | <b>Coherence increased</b> in theta and<br><b>decreased</b> in alpha band in ASD. |

## References

1. Boersma M, *et al.* (2013) Disrupted functional brain networks in autistic toddlers. *Brain connectivity* 3(1):41-49.
2. Kikuchi M, *et al.* (2014) Reduced long-range functional connectivity in young children with autism spectrum disorder. *Social cognitive and affective neuroscience*.
3. Isler JR, Martien KM, Grieve PG, Stark RI, & Herbert MR (2010) Reduced functional connectivity in visual evoked potentials in children with autism spectrum disorder. *Clin Neurophysiol* 121(12):2035-2043.
4. Coben R, Clarke AR, Hudspeth W, & Barry RJ (2008) EEG power and coherence in autistic spectrum disorder. *Clin Neurophysiol* 119(5):1002-1009.
5. Peters JM, *et al.* (2013) Brain functional networks in syndromic and non-syndromic autism: a graph theoretical study of EEG connectivity. *Bmc Med* 11.
6. Duffy FH & Als H (2012) A stable pattern of EEG spectral coherence distinguishes children with autism from neuro-typical controls - a large case control study. *Bmc Med* 10.
7. Lazarev VV, Pontes A, Mitrofanov AA, & deAzevedo LC (2010) Interhemispheric asymmetry in EEG photic driving coherence in childhood autism. *Clin Neurophysiol* 121(2):145-152.
8. Velazquez JLP, *et al.* (2009) Decreased brain coordinated activity in autism spectrum disorders during executive tasks: Reduced long-range synchronization in the fronto-parietal networks. *Int J Psychophysiol* 73(3):341-349.
9. Han YMY, *et al.* (2013) Altered immune function associated with disordered neural connectivity and executive dysfunctions: A neurophysiological study on children with autism spectrum disorders. *Res Autism Spect Dis* 7(6):662-674.
10. Lazar AS, *et al.* (2010) Reduced fronto-cortical brain connectivity during NREM sleep in Asperger syndrome: An EEG spectral and phase coherence study. *Clin Neurophysiol* 121(11):1844-1854.
11. Khan S, *et al.* (2013) Local and long-range functional connectivity is reduced in concert in autism spectrum disorders. *P Natl Acad Sci USA* 110(8):3107-3112.
12. Tsiaras V, *et al.* (2011) Extracting biomarkers of autism from MEG resting-state functional connectivity networks. *Computers in biology and medicine* 41(12):1166-1177.
13. Barttfeld P, *et al.* (2011) A big-world network in ASD: Dynamical connectivity analysis reflects a deficit in long-range connections and an excess of short-range connections. *Neuropsychologia* 49(2):254-263.



14. Barttfeld P, *et al.* (2013) Organization of brain networks governed by long-range connections index autistic traits in the general population. *J Neurodev Disord* 5.
15. Catarino A, *et al.* (2013) Task-related functional connectivity in autism spectrum conditions: an EEG study using wavelet transform coherence. *Molecular autism* 4(1):1.
16. Kenet T, *et al.* (2012) Disconnectivity of the cortical ocular motor control network in autism spectrum disorders. *Neuroimage* 61(4):1226-1234.
17. Leveille C, *et al.* (2010) Enhanced Connectivity Between Visual Cortex and Other Regions of the Brain in Autism: A REM Sleep EEG Coherence Study. *Autism Res* 3(5):280-285.
18. Mathewson KJ, *et al.* (2012) Regional EEG alpha power, coherence, and behavioral symptomatology in autism spectrum disorder. *Clin Neurophysiol* 123(9):1798-1809.
19. Murias M, Webb SJ, Greenson J, & Dawson G (2007) Resting state cortical connectivity reflected in EEG coherence in individuals with autism. *Biol Psychiat* 62(3):270-273.
